# Supplementary material for: Quantitative histological models suggest endothermy in plesiosaurs
Source: PubMed Central journal article supplement (PMC5994164; doi:10.7717/peerj.4955), 2018-06-06
Supplement: peerj-06-4955-s001.pdf [file peerj-06-4955-s001.pdf]

# Supplement

## Histological measurements

**Table S1** Histological measurements for the predictor variable of primary osteon density in extant species. To obtain these values, we reanalyzed sections from Cubo et al. (2012) and Legendre et al. (2016). The measuring approach is explained in the main text. C = Cubo et al. (2012), L = Legendre et al. (2016), CL = Cubo et al. (2012) and Legendre et al. (2016).

|                                 | Primary osteon (vascular) density | Previously used in |
|---------------------------------|-----------------------------------|--------------------|
| <i>Anas platyrhynchos</i>       | 38.3615                           | CL                 |
| <i>Cavia porcellus</i>          | 25.4434                           | CL                 |
| <i>Chelodina siebenrocki</i>    | 0                                 | CL                 |
| <i>Crocodylus niloticus</i>     | 15.3459                           | CL                 |
| <i>Varanus exanthematicus</i>   | 7.6233                            | CL                 |
| <i>Gallus gallus</i>            | 39.2857                           | L                  |
| <i>Microcebus murinus</i>       | 10.9231                           | CL                 |
| <i>Podarcis muralis</i>         | 0                                 | CL                 |
| <i>Mus musculus</i>             | 8.0986                            | CL                 |
| <i>Varanus niloticus</i>        | 0                                 | CL                 |
| <i>Pelodiscus sinensis</i>      | 0                                 | CL                 |
| <i>Pleurodeles walti</i>        | 0                                 | L                  |
| <i>Trachemys scripta</i>        | 0                                 | CL                 |
| <i>Zootoca vivipara</i>         | 0                                 | L                  |
| <i>Dromaius novaehollandiae</i> | 58.2051                           | C                  |
| <i>Lacerta vivipara</i>         | 0                                 | C                  |
| <i>Streptopelia decaocto</i>    | 62.7300                           | C                  |
| <i>Struthio camelus</i>         | 63.1929                           | C                  |
| <i>Turdus merula</i>            | 63.5380                           | C                  |

**Table S2** Histological measurements for the predictor variable of primary osteon density in fossil eosauropterygians. The measuring approach is explained in the main text.

|                                  | Specimen number      | Primary osteon (vascular) density |
|----------------------------------|----------------------|-----------------------------------|
| <i>Anarosaurus heterodontus</i>  | Wijk. 06-38fe        | 29.1428                           |
| <i>Neusticosaurus edwardsii</i>  | PIMUZ T3455          | 20.7594                           |
| <i>Nothosaurus</i> sp.           | IGWH 21              | 20.4726                           |
| <i>Pistosaurus longaeus</i>      | SMNS 84825           | 44.1756                           |
| <i>Plesiosaurus dolichodirus</i> | STIPB R90            | 61.2496                           |
| <i>Rhaeticosaurus mertensi</i>   | LWL MfN P 64047, PM3 | 65.4465                           |
| <i>Cryptoclidus eurymerus</i>    | STIPB R324           | 40.5865                           |
| Elasmosauridae indet.            | OMNH MV 85           | 61.6824                           |

## Mass-specific resting metabolic rate

**Table S3** R statistics of the model to predict resting metabolic rate. *t value* refers to the t-rest of the respective line in the table.  $Pr(> |t|)$  is the p value for the t-test. V6, V12, V4 and V5 are the selected vectors of the model.

|                  | Estimate | Std. Error | t value | $Pr(>  t )$ |
|------------------|----------|------------|---------|-------------|
| Intercept        | -2.60140 | 0.10986    | -23.679 | 1.08e-08    |
| Vascular density | 1.25973  | 0.05662    | 22.250  | 1.76e-08    |
| V6               | -2.19179 | 0.28100    | -7.800  | 5.24e-05    |
| V12              | 1.85050  | 0.28680    | 6.452   | 0.000198    |
| V4               | 1.12452  | 0.29526    | 3.809   | 0.005173    |
| V5               | -0.88714 | 0.28021    | -3.166  | 0.013276    |

The multiple R-squared value of the model for metabolic rate is 0.9851, the adjusted R-squared value is 0.9758.

The F statistic of the overall analysis is 106 on 5 and 8 DF (degrees of freedom) with a p-value of 4.33e-07.

The AICc of the model including vascular (primary osteon) density as a predicting variable is 21.59739. The AICc of the model including phylogeny only is 24.34401.

The steepness parameter was estimated to be  $a = 0$ .

**Table S4** Mass-specific resting metabolic rate (RMR) in mL O<sub>2</sub> h<sup>-1</sup> g<sup>-0.67</sup> estimated from bone histology and taking into account phylogenetic relationships using the PEM approach. Lower and upper values correspond to 95 % confidence intervals.

|                                  | Lower    | RMR      | Upper    |
|----------------------------------|----------|----------|----------|
| <i>Anarosaurus heterodontus</i>  | 3.431286 | 4.825407 | 6.785948 |
| <i>Neusticosaurus edwardsii</i>  | 2.305951 | 3.200634 | 4.442441 |
| <i>Nothosaurus</i> sp.           | 2.309282 | 3.14758  | 4.290194 |
| <i>Pistosaurus longaevus</i>     | 5.452919 | 8.033297 | 11.83474 |
| <i>Plesiosaurus dolichodirus</i> | 7.186786 | 12.03066 | 20.13930 |
| <i>Rhaeticosaurus mertensi</i>   | 7.86524  | 13.06124 | 21.68988 |
| <i>Cryptoclidus eurymerus</i>    | 4.013786 | 7.237769 | 13.05134 |
| Elasmosauridae indet.            | 6.31384  | 12.13612 | 23.32741 |

## Bone growth rate

**Table S5** R statistics of the model used to predict bone apposition rate. *t* value refers to the t-test of the respective line in the table.  $Pr(> |t|)$  is the p value for the t-test. V7, V14 and V5 are the selected vectors of the model.

|                  | Estimate | Std. Error | t value | Pr(>  t ) |
|------------------|----------|------------|---------|-----------|
| Intercept        | 0.15086  | 0.15154    | 0.995   | 0.340895  |
| Vascular density | 1.08176  | 0.05716    | 18.926  | 9.65e-10  |
| V7               | -1.85088 | 0.37837    | -4.892  | 0.000478  |
| V14              | 1.19846  | 0.38776    | 3.091   | 0.010273  |
| V5               | 0.95188  | 0.38500    | 2.472   | 0.030989  |

The multiple R-squared value of the model for bone growth rate is 0.9725, the adjusted R-squared value is 0.9624.

The F statistic of the overall analysis is 97.09 on 4 and 11 DF (degrees of freedom) with a p-value of 1.67e-08.

The AICc of the model including vascular (primary osteon) density as a predicting variable is 26.30375. The AICc of the model including phylogeny only is 31.2819.

The steepness parameter was estimated to be  $a = 0$ .

**Table S6** Bone growth rate in  $\mu\text{m}/\text{day}$  estimated from bone histology and taking into account phylogenetic relationships using the PEM approach. Lower and upper values correspond to 95% confidence intervals.

|                                  | Lower    | RMR      | Upper     |
|----------------------------------|----------|----------|-----------|
| <i>Anarosaurus heterodontus</i>  | 31.51501 | 42.39142 | 57.02153  |
| <i>Neusticosaurus edwardsii</i>  | 22.84954 | 29.79674 | 38.85621  |
| <i>Nothosaurus</i> sp.           | 22.54019 | 29.37212 | 38.27485  |
| <i>Pistosaurus longaevus</i>     | 47.66656 | 65.66986 | 90.47287  |
| <i>Plesiosaurus dolichodirus</i> | 60.50754 | 92.89297 | 142.61200 |
| <i>Rhaeticosaurus mertensi</i>   | 65.48237 | 99.68617 | 151.75600 |
| <i>Cryptoclidus eurymerus</i>    | 35.91600 | 60.04474 | 100.38330 |
| Elasmosauridae indet.            | 50.07065 | 93.59182 | 174.94140 |

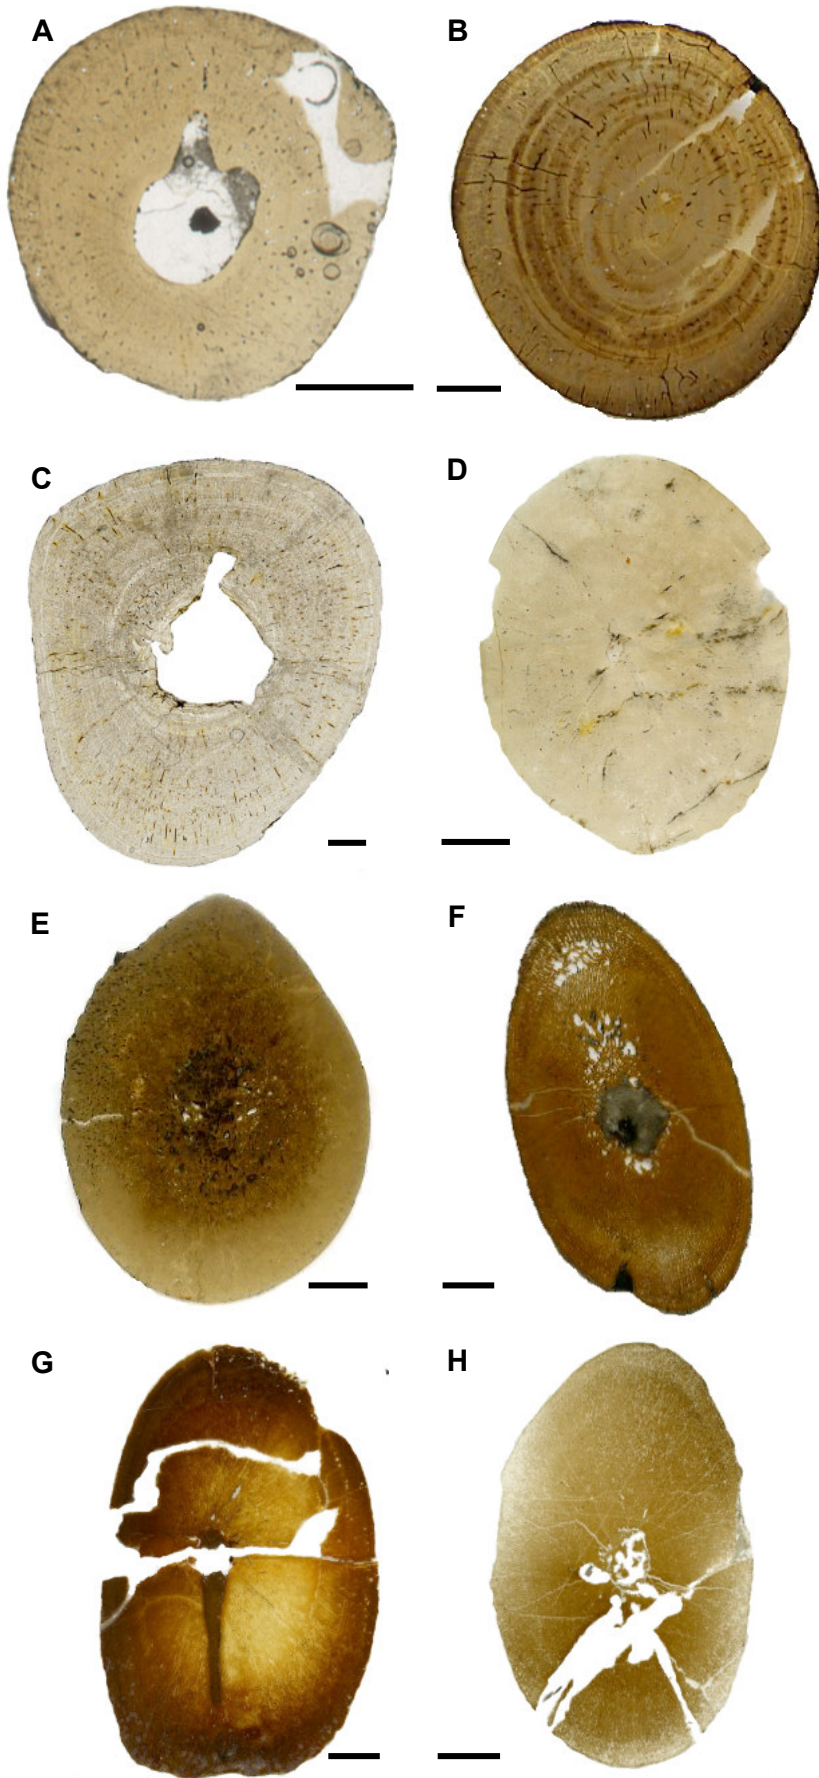

**Figure S1** (Previous page) Bone cross sections analyzed in this study. **A** *Anarosaurus heterodontus* Wijk. 06-38fe, scale bar = 1 mm. **B** *Neusticosaurus edwardsii* PIMUZ T3455, scale bar = 1 mm. **C** *Nothosaurus* sp. IGWH 21, scale bar = 1 mm. **D** *Pistosaurus longaevus* SMNS 84825, scale bar = 5 mm. **E** *Rhaeticosaurus mertensi* LWL MfN P 64047, scale bar = 5 mm. **F** *Plesiosaurus dolichodirus* STIPB R90, scale bar = 5 mm. **G** *Cryptoclidus eurymerus* STIPB R 324, scale bar = 1 cm. **H** Elasmosauridae indet. OMNH MV 85, scale bar = 1 cm. Photos by Corinna V. Fleischle.
